# Supplementary material
Source: publisher figshare collection journal article supplement (https://rs.figshare.com/ndownloader/files/14651384)
Supplement: Supplementary file 1 [file 14651384]

## Sheet: Species 2007
30d	TAXA	CAGED PANELS (CP)						FENCED PANELS (FP)
		B1P1	B1P1'	B3P1	B5P1	B6P1	B10P1	B1P5	B4P5	B5P5	B7P5	B9P5	B10P5
	Clavelina oblonga	23.82	14.13	28.25	55.68	34.63	57.06	0	17.17	11.08	7.2	15.79	11.36
	Trididemnum orbiculatum	3.6	4.71	3.6	0	1.66	3.88	0	0	0	0	0	0
	Symplegma rubra	0	0	0	0	0	0	0	0	0	0	0	0
	Botrylloides giganteum	0	0	0.83	0	0	0	0	0	0	0	0	0
	Symplegma sp1.	18.56	0.55	2.77	5.82	7.76	8.03	0	0	5.26	0	6.37	0
	Didemnum perlucidum	4.71	8.86	6.93	2.77	1.94	0	0	0	0	0	0	0
	Polyandrocarpa zorritensis	0.55	0.83	0	0	0	0	0	0	0	0	0	0
	Catenicella uberrima	0	2.49	0	3.05	0.55	0	0	0	1.39	1.94	0.55	2.22
	Bugula neritina	1.66	1.66	0	2.49	2.49	4.43	0	1.39	2.77	0	1.39	0
	Schizoporella errata	0	0	0.28	0.83	0	0	0	1.66	0.28	2.22	0.55	1.11
	Sponge sp.1 (orange)	0.83	0.28	0.55	0.83	0.55	0	0	0	0.28	0	1.11	0
	Ascidia interrupta	0	0	0	0	0.28	0	0	0	0	0	0	0
	Ascidia curvata	0.28	0	0	0	0	0	0	0	0	0	0	0
	Ostreidae	11.91	20.22	32.69	18.84	21.33	11.63	1.66	11.63	21.33	31.3	7.76	22.16
	Serpulidae	0	0	0.28	0.28	0	0	0	0	0.28	0	0.83	0.55
	Branchiomma luctuosum	0	0.55	0.28	0	0	0	0	0.55	0	0	0	0
	Amphibalanus sp.	15.24	15.79	8.31	5.26	9.7	5.54	22.71	40.17	31.86	54.02	24.65	27.15
	Barnacle (juvenile)	1.66	3.32	0.28	0.28	1.11	0.28	8.03	7.2	5.54	3.32	5.82	6.37
	Megabalanus coccopoma	0	0	0	0	0	0	0	0.55	1.11	0	0.55	0.55
	Balanus trigonus	0	0.28	0	0	0	0	0	0	0	0	0	0
	BARE SPACE	17.17	26.32	14.96	3.88	18.01	9.14	67.59	19.67	18.84	0	34.63	28.53
	COLONIALS	53.74	33.52	43.21	71.47	49.58	73.41	0	20.22	21.05	11.36	25.76	14.68
	SOLITARIES	29.09	40.17	41.83	24.65	32.41	17.45	32.41	60.11	60.11	88.64	39.61	56.79
60d	TAXA	CAGED PANELS (CP)						FENCED PANELS (FP)
		B1P1	B1P1'	B3P1	B5P1	B6P1	B10P1	B1P5	B4P5	B5P5	B7P5	B9P5	B10P5
	Clavelina oblonga	69.25	58.45	61.77	65.65	72.58	70.64	18.84	55.96	53.46	39.34	67.59	36.57
	Didemnum cineraceum	0	0	0	0	0	0	0	0	0	0	0	0
	Trididemnum orbiculatum	0	0	0.83	0	0.28	0	0	0	0	0	0	0
	Botrylloides niger	0	0	0	0.55	0	0	0	0	0	0	0	0
	Botrylloides giganteum	0	0	1.66	0	0	1.11	0	0	0	0	0	0
	Symplegma sp1.	0.55	0	0	0	0	0	0	0	0	0	0	0
	Didemnum perlucidum	11.36	13.85	8.86	3.88	2.22	1.39	0	0	0	0	0	0
	Symplegma rubra	3.88	2.49	1.11	3.05	4.99	8.86	0	0.28	2.22	0	3.6	0
	Polyandrocarpa zorritensis	0	0	0	0	0	0.28	0.28	0	0	0	0	0
	Catenicella uberrima	1.11	16.34	18.84	5.54	7.48	0.55	13.57	28.81	37.12	50.97	16.34	18.84
	Crisia sp.	0	0	0	0	0	0	0	0	0	0	0	0
	Savignyella lafontii	0	0	0	0	0	0	0	0	0	0	0	0
	Bugula neritina	0	0	0	16.07	0.28	7.48	0	4.16	0.28	0	0	2.22
	Schizoporella errata	0	1.11	0.28	0.28	0	0	0	0	0	0	0	4.16
	Sponge sp.1 (orange)	0	0.28	0	0.28	0	0	0.28	0	0	0	0.55	0.55
	Ascidia interrupta	1.39	0	0	0	0	0	0	0	0	0	0	0
	Ascidia curvata	0	0	0	0	0.28	0	0	0	0	0	0	0
	Ostreidae	5.82	4.43	1.94	1.39	7.2	6.93	18.28	8.03	3.6	5.54	3.6	19.39
	Serpulidae	0	0	0	0	0	0	0.28	0	0	0	0	1.66
	Branchiomma luctuosum	0.28	0	0.83	0.28	0	0.55	0	0	0	0	0.55	0
	Amphibalanus sp.	1.66	0.28	0	0	0	0	28.25	2.49	1.66	0	3.05	6.37
	Barnacle (juvenile)	0	0	0	0	0	0	8.03	0	0	0	0.28	1.66
	Megabalanus coccopoma	0	0	0	0	0	0	0	0	0	0	0	0
	Balanus trigonus	0	0	0	0	0	0	0	0	0	0	0	0
	BARE SPACE	4.71	2.77	3.88	3.05	4.71	2.22	12.19	0.28	1.66	4.16	4.43	8.59
	COLONIALS	86.15	92.52	93.35	95.29	87.81	90.3	32.96	89.2	93.07	90.3	88.09	62.33
	SOLITARIES	9.14	4.71	2.77	1.66	7.48	7.48	54.85	10.53	5.26	5.54	7.48	29.09
90d	TAXA	CAGED PANELS (CP)						FENCED PANELS (FP)
		B1P1	B1P1'	B3P1	B5P1	B6P1	B10P1	B1P5	B4P5	B5P5	B7P5	B9P5	B10P5
	Clavelina oblonga	72.85	49.03	55.12	57.62	66.2	84.49	45.71	68.98	68.7	68.7	55.12	81.16
	Didemnum psammatodes	0	0	0	0.55	0	0	0	0	0	0	0	0
	Didemnum granulatum	0	0	0.28	0	0	0	0	0	0	0	0	0
	Trididemnum orbiculatum	0	3.05	0	0.55	0	0	0	0	0	0	0	0.28
	Botrylloides niger	0.83	1.11	0	4.99	0	0.28	0	0	0.28	0.28	0	2.22
	Symplegma brakenhielmi	0	0.55	0	0	1.11	0	17.45	0	0	0	0	0
	Botrylloides giganteum	0	0	0.83	0	0	0.55	0	0	0	0	0	0
	Didemnum perlucidum	6.09	20.22	9.7	7.2	3.32	2.77	0	0.28	0	0.28	0.28	0.28
	Symplegma rubra	2.49	1.39	1.39	3.32	2.22	0.28	0	0	2.22	0	0	2.22
	Polyandrocarpa zorritensis	0	0	0	0	0	0	0	0	0	0	0	0
	Catenicella uberrima	3.88	0	0	11.08	0	3.05	8.86	21.33	13.02	0	20.22	5.26
	Crisia sp.	0	3.88	13.57	3.88	9.14	0	11.36	0	0	19.94	0	0
	Amathia verticillata	0	0	0	0	0	0	0	8.86	0	3.88	0	0
	Schizoporella errata	0	0.55	0	0.55	0	0	1.66	0	0	0	0	0
	Sponge sp.1 (orange)	0	0.277008	0.831025	0	0.831025	0.277008	1.38504	0	0	0	0.277008	0
	Sponge sp.2 (white)	0	0	0	0	0	0	0	0	0	0	0	0
	Phallusia nigra	0	2.49	1.94	1.39	0.28	0.28	0	0	0.28	0	0	0.83
	Herdmania palida	0	0	4.16	0	0.28	1.66	0	0	0	0	0	3.05
	Microcosmus exasperatus	0	0	0	0	0	0.55	0	0.55	0.83	0	0	0
	Ciona intestinales	0	0	0	0	3.88	0.28	0	0	0	0	0	0
	Ascidia interrupta	1.11	0.28	0	0	1.66	1.94	0	0	4.71	0	0	0.83
	Ascidia curvata	0	1.39	0	0	4.71	0	0	0	0	0	0	0
	Ostreidae	9.97	8.59	5.54	3.05	1.66	2.77	4.71	0	0	0.55	0	2.49
	Serpulidae	0.28	0	0	0	0	0	0	0	0	0	0	0
	Branchiomma luctuosum	2.49	0.55	2.49	2.22	0.28	0.83	0	0	8.86	3.88	24.1	0
	Amphibalanus sp.	0	0.28	0.28	0	0	0	2.49	0	0	0	0	0
	Barnacle (juvenile)	0	0	0	0	0	0	0	0	0	0	0	0
	Balanus trigonus	0	0	0	0	0	0	0	0	0	0	0	0
	BARE SPACE	0	6.37119	3.87812	3.60111	4.43213	0	6.37119	0	1.10803	2.49307	0	1.38504
	COLONIALS	86.15	80.06	81.72	89.75	82.83	91.69	86.43	99.45	84.21	93.07	75.9	91.41
	SOLITARIES	13.85	13.57	14.4	6.65	12.74	8.31	7.2	0.55	14.68	4.43	24.1	7.2
120d	TAXA	CAGED PANELS (CP)						FENCED PANELS (FP)
		B1P1	B1P1'	B3P1	B5P1	B6P1	B10P1	B1P5	B4P5	B5P5	B7P5	B9P5	B10P5
	Clavelina oblonga	14.4044	22.9917	35.7341	20.4986	16.6205	31.856	76.7313	64.2659	77.0083	60.9418	12.7424	67.036
	Didemnum psammatodes	0	0	0	0	0	0	0	0	0	0	0	0
	Didemnum granulatum	0	0	0.554017	0	0.554017	0	0	0	0	0	0	0
	Trididemnum orbiculatum	0	1.38504	0	0	3.3241	0	0	0	0	0	0	0
	Botryllus humilis	0	0	0	0	0	3.87812	0	0	0	0	0	0
	Botrylloides niger	3.04709	0.554017	0	6.37119	1.10803	1.93906	0	1.10803	3.04709	0	0.554017	1.10803
	Symplegma brakenhielmi	0	0	5.54017	2.21607	0	0	0.831025	1.93906	0.277008	2.21607	0	0
	Symplegma sp.2	0	0	0	0	0	0	0	0	0	0	0	0
	Botrylloides giganteum	0	0	1.38504	0	0	1.38504	0	0	0	0	0	1.38504
	Didemnum perlucidum	20.7756	44.0443	14.9584	26.3158	4.43213	18.8366	0.277008	2.77008	1.66205	0	1.10803	11.0803
	Didemnum sp.	0	0	0	0	3.3241	0	0	0	0	0	0	0
	Symplegma rubra	0.277008	0.277008	1.93906	8.58726	0	1.10803	0	0	1.10803	0.831025	1.93906	0
	Catenicella uberrima	46.8144	5.81717	12.7424	11.3573	26.5928	11.3573	13.2964	4.70914	0	10.5263	0	5.26316
	Crisia sp.	0	0	0	0	0	0	0	0	0	0	0	0
	Bugula neritina	0	0	0	0	0	0.277008	0	0	0	1.38504	0	0
	Amathia verticillata	0	0	0	7.47922	21.3296	3.87812	0	14.9584	4.15512	2.49307	60.9418	0
	Schizoporella errata	0	0	0	0.831025	0	0	1.66205	0.831025	0	0	0	0
	Sponge sp.1 (organge)	2.49307	0.277008	2.21607	2.49307	1.38504	1.10803	0.277008	0.554017	1.10803	1.93906	3.87812	0.554017
	Phallusia nigra	2.21607	9.9723	8.86427	6.6482	4.70914	7.20222	0	0	2.49307	3.3241	4.15512	5.26316
	Herdmania palida	0.277008	0.554017	6.09418	0.831025	3.60111	1.38504	0	0	0	0	0	3.60111
	Microcosmus exasperatus	0	0.277008	0	0	1.10803	0	0	0	0	0	0	0
	Ciona intestinales	1.38504	0	0	0	0.277008	5.26316	0	0	0	0	0	0
	Ascidia interrupta	0	0	0	0	0	0	0	0	0	0	0	0
	Ascidia curvata	0	0.277008	0	0	1.10803	3.87812	0	0	0	0	0	0
	Ostreidae	1.10803	0.831025	0.277008	0	0	0	0	1.10803	0	1.10803	0	0
	Serpulidae	0	0	0	0	0	0	0	0	0.277008	0	0	0
	Branchiomma luctuosum	1.66205	0.831025	1.66205	4.98615	4.98615	1.38504	3.3241	3.60111	0.277008	4.98615	11.6343	2.77008
	Amphibalanus sp.	0	0	0	0	0	0	0	0	0	0	0	0
	Barnacle (juvenile)	0	0	0	0	0	0	0	0	0	0	0	0
	Balanus trigonus	0	0	0	0	0	0	0	0	0	0	0	0
	BARE SPACE	5.54017	11.9114	8.03324	1.38504	5.54017	5.26316	3.60111	4.15512	8.58726	10.2493	3.04709	1.93906
	COLONIALS	87.8116	75.3463	75.0693	86.1496	78.6704	75.6233	93.0748	91.1357	88.3657	80.3324	81.1634	86.4266
	SOLITARIES	6.6482	12.7424	16.8975	12.4654	15.7895	19.1136	3.3241	4.70914	3.04709	9.41828	15.7895	11.6343
150d	TAXA	CAGED PANELS (CP)						FENCED PANELS (FP)
		B1P1	B1P1'	B3P1	B5P1	B6P1	B10P1	B1P5	B4P5	B5P5	B7P5	B9P5	B10P5
	Clavelina oblonga	8.86427	0	20.7756	14.9584	12.4654	19.3906	49.5845	48.7535	57.0637	2.21607	6.92521	44.5983
	Didemnum psammatodes	0	0	0	0	0	0	0	0	0	0	0	0
	Didemnum granulatum	0	0	0	0	0	0	0	0	0	0	0	0
	Trididemnum orbiculatum	0	0	0	0.831025	0	0	0.277008	0	0.277008	0	0	0
	Botryllu humilis	0	0	0	0	0	0	0	0	0	0	0	0
	Botrylloides niger	1.66205	0	0	0	5.26316	1.38504	1.38504	1.93906	6.37119	0	2.77008	1.93906
	Symplegma brakenhielmi	0	0	4.15512	0	2.77008	1.10803	8.03324	2.49307	1.66205	13.0194	4.43213	0
	Symplegma sp.2	0	0	0	0	0	0	0	0	0	0	0	0
	Botrylloides giganteum	0	0	1.93906	3.3241	0	0	0	0	0	0	0	3.04709
	Didemnum perlucidum	17.4515	0	18.5596	35.1801	18.5596	22.4377	0.554017	2.49307	1.93906	0	0	5.26316
	Didemnum sp.	0	0	0	0	0	0	0	0	0	0	0	0
	Symplegma rubra	0.554017	0	1.38504	0	1.66205	0.554017	0	3.87812	1.38504	0.831025	22.7147	0
	Catenicella uberrima	51.8006	19.6676	11.3573	25.7618	22.9917	14.1274	0.554017	0.554017	3.87812	2.49307	1.66205	19.3906
	Crisia sp.	0	0	0	0	0	0	1.66205	0	0	0	0	0
	Savignyella lafontii	0	0	0	0	0	0	0	3.04709	0	0	0	0
	Bugulaneritina	0	0	0	0	0	2.77008	0	0.554017	0	0	0.554017	0
	Amathia verticillata	0	0	0	0	16.3435	16.8975	0	11.3573	0	45.9834	29.0859	0
	Schizoporella errata	0	0	0	0	0	0	5.54017	0	4.70914	0	0	0
	Sponge sp.1 (orange)	0.554017	1.10803	0.554017	0.554017	0	1.66205	1.10803	1.10803	3.04709	1.10803	10.8033	3.60111
	Sponge sp.2 (white)	0	0	0.554017	0	0	0	0	0	0	0	0	0
	Phallusia nigra	12.4654	9.41828	21.6066	8.86427	10.2493	8.58726	0.554017	0.554017	7.20222	9.9723	8.31025	9.9723
	Herdmania palida	0.554017	0	3.60111	0	3.87812	4.15512	0	0	0	0	0	6.09418
	Microcosmus exasperatus	0.831025	0	0	0	0	0	0	0	0	0	0	0
	Ciona intestinales	1.38504	0	0	0	0.277008	0	0	0	0	0	0	0
	Ascidia interrupta	0	0	0	0	0	0	0	0	0	0	0.554017	0
	Ascidia curvata	0	0	0	0	0	0	0	0	0	0	0	0
	Ostridae	0	10.5263	0	0	0	0	0.277008	0.277008	0.277008	0	0	0
	Serpulidae	0	0	0	0	0	0	0	0	0	0	0	0
	Branchiomma luctuosum	3.04709	3.3241	0	4.43213	2.49307	1.66205	5.81717	11.3573	0	3.04709	0	0.277008
	Amphibalanus sp.	0	1.10803	0	0	0	0	0	0	0.554017	0	0	0
	Barnacle (juvenile)	0	0	0	0	0	0	0	0	0	0	0	0
	Balanus trigonus	0	0	0	0	0	0	0	0	0	0	0	0
	BARE SPACE	0.831025	54.8476	16.0665	6.09418	3.04709	5.26316	24.6537	11.6343	12.1884	21.3296	12.1884	5.81717
	COLONIALS	80.89	20.78	59.28	80.61	80.06	80.33	68.7	76.18	80.33	65.65	78.95	77.84
	SOLITARIES	18.28	24.38	25.21	13.3	16.9	14.4	6.65	12.19	8.03	13.02	8.86	16.34
180d	TAXA	CAGED PANELS (CP)						FENCED PANELS (FP)
		B1P1	B1P1'	B3P1	B5P1	B6P1	B10P1	B1P5	B4P5	B5P5	B7P5	B9P5	B10P5
	Clavelina oblonga	7.20222	8.03324	12.1884	5.54017	3.87812	9.41828	33.795	32.687	44.0443	33.795	11.0803	18.5596
	Didemnum psammatodes	0	0	0	0	0	0	0	0	0	2.49307	0	0
	Didemnum granulatum	0	0	1.10803	0	0	0	0	0	0	0	0	0
	Trididemnum orbiculatum	0	0	3.3241	1.10803	1.10803	6.09418	0	1.93906	0	0	0	0
	Botrylloides nigrum	0	0	0.277008	0	4.70914	0.831025	14.1274	3.04709	5.54017	3.3241	0.554017	0.831025
	Symplegma brakenhielmi	0	0	6.6482	0	2.49307	0.277008	21.8837	8.03324	1.10803	14.6814	14.6814	1.66205
	Symplgma sp.2	0	1.66205	0	0	0	0	0	0	0	0	0.831025	0
	Botrylloides giganteum	0	0	2.77008	0	0	0.831025	0	0	0	0	0	0
	Didemnum perlucidum	17.7285	0	22.7147	33.795	19.6676	19.6676	0	11.6343	1.38504	0	0	10.8033
	Symplegma rubra	0	0	1.10803	0	0	1.38504	0	0.831025	0.277008	0	1.38504	0
	Catenicella uberrima	59.8338	49.3075	11.6343	33.795	35.4571	27.9778	21.0526	0	4.70914	10.5263	16.8975	21.0526
	Savignyella lafontii	0	0	0	0.554017	0	0	0	13.8504	0	0	0	0
	Bugula neritina	0	3.60111	0	0	0	0	0	4.98615	6.37119	0	0	0
	Amathia verticillata	0	0	0	0	0	0	0	0	0	0	3.04709	0
	Schizoporella errata	0	0	0	0	0	0	3.04709	1.66205	1.10803	1.66205	0.831025	0
	Sponge sp.1 (orange)	0	0.831025	3.87812	1.93906	0.831025	3.60111	3.04709	15.7895	14.4044	10.8033	22.9917	11.3573
	Phallusia nigra	6.37119	9.9723	26.8698	11.6343	15.5125	15.2355	0	0	7.47922	17.4515	12.1884	15.2355
	Herdmania palida	0.554017	0	4.43213	0	10.8033	3.04709	0	0	0.831025	0	0	4.15512
	Ciona intestinales	1.66205	0	0	0	0	0.554017	0	0	0	0	0	0
	Ascidia curvata	0.554017	0	0	2.49307	0	3.87812	0	0	0	0	0	0
	Ostreidae	0	0	0	0	0	0	0	0	0.277008	0	0	0
	Serpulidae	4.15512	0.277008	0	4.70914	4.15512	1.10803	0	0	0	0	0.554017	0
	BARE SPACE	1.93906	26.3158	3.04709	4.43213	1.38504	6.09418	3.04709	5.54017	12.4654	5.26316	14.9584	16.3435
	COLONIALS	84.76	63.43	65.65	76.73	68.14	70.08	96.95	94.46	78.95	77.29	72.3	64.27
	SOLITARIES	13.3	10.25	31.3	18.84	30.47	23.82	0	0	8.59	17.45	12.74	19.39

## Sheet: Species 2010
30d	Site	Feiticeira																								Curral
	Treatment	Caged Panels (CP)												Fenced Panels (FP)												Caged Panels (CP)												Fenced Panels (FP)
	Botrylloides niger	0	0	0	0	0	0	0	0	0	0	8	0	0	0	0	0	0	0	1	0	0	0	0	0	0	0	0	0	0	0	0	9	0	0	0	2	0	0	0	0	0	3	0	0	0	0	0	1
	Clavelina oblonga	0	0	0	0	0	0	0	0	0	0	0	0	0	0	0	0	0	0	0	1	0	0	0	0	0	0	0	0	0	0	0	0	0	0	0	0	0	0	0	0	0	0	0	0	0	0	0	0
	Didemnum sp.	0	0	0	0	0	0	0	0	0	0	0	0	0	0	0	0	0	0	0	0	0	0	0	0	0	0	0	0	0	0	0	0	0	0	0	0	0	0	0	0	0	0	0	0	0	0	0	0
	Didemnum perlucidum	0	0	1	1	26	28	0	0	0	0	0	1	16	0	9	2	2	4	0	0	0	0	0	0	0	0	0	0	9	2	0	0	1	0	17	7	0	0	0	0	2	0	0	0	0	1	0	8
	Didemnum cineraceum	0	0	0	0	0	0	0	0	0	0	0	0	0	0	0	0	0	0	0	0	0	0	0	0	0	0	0	0	0	0	0	0	1	0	0	0	0	0	0	0	0	0	0	0	0	0	0	0
	Didemnum psammatode	0	0	0	0	7	7	0	0	0	0	3	0	0	1	1	0	2	0	1	0	0	1	0	0	2	1	0	0	12	12	5	6	3	1	0	4	4	1	2	0	3	6	3	8	3	0	1	2
	Diplosoma listerianum	0	23	2	0	0	23	1	0	0	0	0	0	35	0	0	0	0	0	6	0	15	0	0	0	0	0	0	0	0	0	0	0	1	0	0	0	0	0	0	0	0	2	0	0	0	0	0	0
	Symplegma brakenhielmi	0	0	0	0	0	0	0	0	0	0	0	0	0	0	0	0	0	0	0	0	0	0	0	0	0	0	0	0	0	0	0	0	0	0	0	0	0	0	0	0	0	0	0	0	0	0	0	0
	Symplegma rubra	0	0	0	0	0	0	0	0	0	0	0	0	2	0	0	0	0	0	0	0	0	0	0	0	0	0	0	0	0	0	0	0	0	0	0	0	0	0	0	0	0	0	0	0	0	0	0	0
	Symplegma sp1	25	9	0	6	8	4	0	0	0	2	0	13	22	9	1	4	3	0	0	1	0	0	0	0	0	0	0	0	0	0	0	0	0	0	0	0	0	0	0	0	0	0	0	0	0	0	0	0
	Trididemnum orbiculatum	0	0	0	0	0	0	0	0	0	0	0	0	0	0	0	0	0	0	0	0	0	0	0	0	1	1	1	0	0	0	3	0	1	0	3	2	0	4	0	0	3	1	0	0	3	0	2	2
	Crisia sp1	0	1	0	0	0	0	2	0	0	0	0	0	0	0	0	0	0	0	0	0	0	0	0	0	0	0	0	0	0	0	0	0	0	0	0	0	0	0	0	0	0	0	0	0	0	0	0	0
	Amathia brasiliensis	0	0	0	0	0	0	0	0	0	0	0	0	0	0	0	0	0	0	2	0	0	0	0	0	0	0	0	0	0	0	0	0	0	0	0	0	0	0	0	0	0	0	0	0	0	0	0	0
	Catenicella uberrima	0	2	7	1	8	0	11	22	2	6	3	0	0	1	6	5	16	18	11	1	0	0	4	4	0	0	0	0	0	0	0	0	0	0	0	0	0	0	0	0	0	0	0	0	0	0	0	0
	Savignyella lafontii	0	0	0	6	0	0	0	0	0	0	0	0	0	0	3	0	0	0	0	0	0	0	0	0	0	0	0	0	0	0	0	0	0	0	0	0	0	0	0	0	0	0	0	0	0	0	0	0
	Scrupocellaria sp.	0	0	0	3	0	0	0	0	0	0	0	0	0	0	0	0	0	0	1	0	0	0	0	0	0	0	0	0	0	0	0	0	0	5	0	0	0	0	0	0	0	0	0	0	0	0	0	0
	Bugula neritina	0	0	0	0	0	0	0	0	0	0	0	0	0	0	0	0	0	0	0	0	0	0	0	0	0	0	0	0	0	0	0	0	0	0	0	0	0	0	0	0	0	0	0	0	0	0	0	0
	Crisia sp2	0	0	0	0	0	0	0	0	0	0	0	0	0	0	0	0	0	0	0	0	0	0	0	0	0	0	0	0	0	0	0	0	0	0	0	1	0	0	0	0	0	0	0	0	0	0	0	0
	Arbopercula tenella	0	0	0	0	1	0	0	0	0	0	0	0	0	0	0	0	0	0	0	0	0	0	0	0	0	0	0	0	0	0	0	0	0	0	0	0	0	0	0	0	0	0	0	0	0	0	0	0
	Schyzoporella errata	0	0	1	0	0	0	0	0	1	0	0	0	0	0	0	0	0	1	0	0	0	0	0	0	0	0	0	0	0	0	0	0	0	0	0	0	0	0	0	0	0	0	0	0	0	0	0	0
	Amathia verticillata	0	0	4	0	0	0	0	0	0	0	0	0	0	0	0	0	0	0	0	0	0	0	0	0	0	0	0	0	0	0	0	0	0	0	0	0	0	0	0	0	0	0	0	0	0	0	0	0
	Hydrozoan	3	5	14	8	1	6	4	5	11	5	0	1	9	55	20	19	4	18	21	32	44	54	16	29	12	15	23	17	5	2	0	4	6	7	6	11	54	7	12	20	17	5	5	8	10	30	16	44
	Sponge sp1 (yellow)	0	0	0	0	0	0	0	0	0	0	0	0	0	0	1	0	0	0	0	0	0	0	0	0	0	0	0	0	0	0	0	0	0	0	0	0	0	0	0	0	0	0	0	0	0	0	0	0
	Sponge sp2 (white)	0	0	0	0	0	0	0	0	0	0	0	0	0	0	0	0	0	0	0	1	0	0	0	0	0	0	0	0	0	0	0	0	0	0	0	0	0	0	0	0	0	0	0	0	0	0	0	0
	Sponge sp3 (orange)	0	0	0	0	0	0	0	0	0	0	0	0	0	0	0	0	0	0	0	0	1	1	0	0	0	0	0	0	0	0	0	1	0	0	1	0	0	0	0	0	0	0	0	0	0	0	2	1
	Ascidia curvata	0	0	0	0	1	0	0	0	1	0	0	0	0	0	0	0	0	0	0	0	0	0	0	0	0	0	0	0	0	0	0	0	0	0	0	0	0	0	0	0	0	0	0	0	0	0	0	0
	Phallusia nigra	0	0	0	0	0	0	0	0	0	0	0	1	0	0	0	0	0	0	0	0	0	0	0	0	0	0	0	0	1	0	0	0	0	0	0	1	0	0	0	0	0	0	0	0	0	0	0	0
	Ostreidae	1	2	3	0	3	1	3	0	0	0	4	0	0	0	0	0	1	0	1	2	0	0	0	0	0	0	2	2	3	4	0	2	2	1	0	1	1	0	1	2	2	0	0	1	2	1	1	0
	Balanus trigonus	0	0	0	0	0	0	0	0	0	0	0	0	0	0	0	0	0	0	0	0	0	0	0	0	0	0	0	0	0	0	0	0	0	0	0	0	0	0	0	0	0	0	0	0	0	0	0	0
	Serpulidae	0	0	0	0	0	0	1	0	0	0	0	0	0	0	0	0	0	1	0	0	0	0	0	0	0	0	0	0	0	0	0	0	0	0	0	0	0	0	0	0	0	0	0	0	0	0	0	0
	Bare Space	71	58	68	75	45	31	78	73	85	87	82	84	16	34	59	70	72	58	56	62	40	44	80	67	85	83	74	81	70	80	92	78	85	86	73	71	41	88	85	78	73	83	92	83	82	68	78	42
	Colonials	28	40	29	25	51	68	18	27	14	13	14	15	84	66	41	30	27	41	43	36	60	56	20	33	15	17	24	17	26	16	8	20	13	13	27	27	58	12	14	20	25	17	8	16	16	31	21	58
	Solitaries	1	2	3	0	4	1	4	0	1	0	4	1	0	0	0	0	1	1	1	2	0	0	0	0	0	0	2	2	4	4	0	2	2	1	0	2	1	0	1	2	2	0	0	1	2	1	1	0
	COLONIALS COUNT	2	5	6	6	6	5	4	2	3	3	3	3	5	4	7	4	5	4	7	5	3	3	2	2	3	3	2	1	3	3	2	4	6	3	4	6	2	3	2	1	4	5	2	2	3	2	4	6
	SOLITARIES COUNT	1	1	1	0	2	1	2	0	1	0	1	1	0	0	0	0	1	1	1	1	0	0	0	0	0	0	1	1	2	1	0	1	1	1	0	2	1	0	1	1	1	0	0	1	1	1	1	0
100d	Site	Feiticeira																																				Figueira
	Treatment	Caged Panels (CP)																		Fenced Panels (FP)																		Caged Panels (CP)
	Botrylloides niger	0	0	0	2	0	4	0	0	4	0	0	0	0	0	0	0	0	0	0	0	0	0	0	0	0	0	0	0	0	0	0	0	0	0	8	0	1	2	0	0	0	0	1	0	3	0	0	0
	Clavelina oblonga	0	0	0	0	12	0	1	0	3	3	0	0	0	0	0	0	0	0	0	0	0	0	0	0	5	40	4	0	3	0	6	1	0	0	5	0	0	0	0	0	0	0	0	0	0	0	0	0
	Lissoclinum sp.	0	0	0	0	0	0	0	10	0	0	0	0	26	0	0	0	0	0	0	0	0	0	0	0	0	0	0	1	0	0	0	0	0	0	0	0	0	0	0	0	0	0	0	0	0	0	0	0
	Didemnum sp.	0	0	0	0	0	0	0	0	0	31	0	0	0	0	0	0	0	0	0	0	0	0	0	0	0	0	0	0	0	0	0	0	0	0	0	0	0	0	0	1	0	0	0	0	0	0	0	0
	Didemnum perlucidum	63	65	40	1	0	0	23	21	13	53	36	37	46	77	67	57	55	42	9	19	35	16	30	18	0	9	1	0	9	17	27	38	33	33	25	37	0	0	0	31	0	0	43	16	2	0	1	8
	Didemnum cineraceum	0	0	0	0	0	0	0	0	0	0	0	0	0	0	0	0	0	0	0	0	0	0	1	0	0	0	0	0	13	0	0	0	0	0	0	0	0	0	0	0	0	0	0	0	0	0	0	0
	Didemnum psammatodes	0	0	0	0	10	0	0	0	0	0	0	0	0	0	0	6	0	0	0	0	0	0	0	0	3	0	40	1	0	0	7	3	0	0	20	0	0	0	0	0	0	0	9	0	0	0	0	0
	Diplosoma listerianum	0	0	0	24	0	21	14	0	0	0	0	0	0	0	0	0	0	2	57	41	58	0	0	0	5	0	7	24	8	14	0	30	20	0	0	0	0	2	0	0	0	5	0	0	0	0	0	0
	Polyclinum constellatum	0	0	0	0	0	0	0	0	0	0	0	0	0	0	0	0	0	0	0	0	0	0	0	0	0	0	0	0	0	0	0	0	0	0	0	0	0	0	0	0	0	0	0	0	7	2	0	0
	Symplegma brakenhielmi	0	0	0	0	0	0	0	0	0	0	0	0	0	0	0	0	0	0	0	0	0	0	0	0	0	0	0	0	1	0	0	0	0	0	0	0	0	0	0	0	0	0	0	3	0	0	11	0
	Symplegma rubra	0	1	0	0	0	0	3	0	0	0	1	0	0	0	0	1	0	0	0	0	0	0	0	0	0	1	0	1	0	0	0	4	4	0	0	0	7	0	1	1	0	2	0	0	0	2	11	0
	Symplegma sp1	0	0	0	0	0	0	0	0	0	0	0	0	0	0	0	0	0	0	0	0	0	0	0	0	0	17	0	0	0	0	0	0	7	0	0	0	0	0	0	0	2	0	0	0	0	0	0	0
	Symplegma sp2	0	0	0	0	0	0	0	0	0	0	0	0	0	0	0	0	0	0	0	0	0	0	0	0	0	0	0	0	0	0	0	0	0	0	0	0	0	0	0	0	0	0	0	0	0	0	0	0
	Trididemnum orbiculatum	0	0	0	17	7	0	0	2	0	0	5	0	1	0	0	0	0	0	16	0	0	10	6	4	0	0	0	0	0	17	0	0	0	0	0	0	0	16	0	1	0	0	0	0	13	0	11	1
	Crisia sp1	0	0	0	0	0	0	0	0	0	0	0	0	0	0	0	8	0	0	0	0	0	0	0	0	0	0	0	0	0	0	0	0	0	0	8	0	0	0	0	0	0	0	2	6	5	0	20	29
	Amathia brasiliensis	0	0	0	0	0	0	2	3	8	0	0	0	11	0	0	0	18	7	0	0	0	12	14	0	0	0	0	0	0	9	11	7	0	19	0	4	0	1	0	0	13	19	8	9	0	0	0	0
	Catenicella uberrima	18	0	52	0	0	4	4	11	8	0	0	27	0	0	7	0	0	0	0	0	0	0	0	16	16	0	3	0	4	5	0	6	0	0	0	31	0	0	0	0	3	17	0	0	0	46	14	0
	Savignyella lafontii	0	0	0	0	0	0	0	0	0	0	0	0	0	0	0	0	0	0	0	0	0	0	0	0	0	0	0	0	0	0	0	0	0	0	0	0	25	15	41	25	0	0	3	0	2	0	0	0
	Scrupocellaria sp	0	0	0	0	0	0	0	0	0	0	0	0	0	0	0	0	0	0	0	0	0	0	0	4	0	0	0	0	0	0	0	0	0	0	0	0	0	0	0	0	0	2	0	1	0	0	2	0
	Bugula neritina	0	0	0	0	0	0	0	0	0	0	0	0	0	0	0	0	0	0	0	0	0	0	0	0	0	0	0	0	0	0	0	0	0	0	0	0	0	0	0	2	8	9	7	11	25	0	2	0
	Hypopodina sp.	0	0	0	47	0	0	0	0	0	0	0	0	0	0	0	0	0	0	0	0	0	0	8	0	0	0	0	0	9	0	0	0	0	39	0	0	0	0	0	0	0	0	0	0	0	0	0	0
	Schyzoporella errata	0	0	0	0	0	0	0	0	0	0	0	0	0	0	0	0	0	0	0	35	7	35	0	0	0	0	0	0	0	0	0	0	0	0	0	0	45	22	0	0	12	22	1	9	11	3	0	0
	Amathia verticillata	0	0	0	0	0	0	0	6	0	0	0	0	0	0	0	0	0	0	0	0	0	0	4	0	0	0	0	0	0	0	0	0	0	0	0	0	0	0	0	0	0	0	0	2	0	0	0	0
	Hydrozoan	0	5	0	0	0	3	0	5	0	5	0	0	0	1	0	0	0	0	0	0	0	0	3	0	0	0	0	4	0	0	0	0	23	0	1	1	9	0	0	0	0	0	1	0	0	0	6	0
	Sponge sp1 (yellow)	0	0	0	0	0	8	6	2	0	0	1	0	0	0	7	0	1	0	0	1	0	6	5	2	4	0	0	3	0	0	0	0	0	0	0	1	0	0	0	0	0	0	0	0	0	0	0	0
	Sponge sp2 (white)	0	0	0	0	0	0	1	1	7	0	1	1	2	0	0	0	0	0	0	0	0	0	0	0	0	0	0	0	0	0	0	0	0	0	0	0	0	0	4	0	3	0	0	0	0	0	0	0
	Sponge sp3 (orange)	0	0	0	0	0	0	0	3	3	0	0	0	0	0	0	0	0	0	0	0	0	0	1	28	0	0	0	1	0	4	0	0	0	0	0	0	0	0	0	0	0	0	0	0	0	0	0	0
	Sponge sp4 (purple)	0	0	0	0	0	0	0	0	0	0	0	0	0	0	0	0	0	0	0	0	0	0	0	0	0	0	0	0	0	0	0	0	0	0	0	0	0	0	0	0	0	0	0	0	0	0	0	0
	Sponge sp5 (red)	0	0	0	0	0	0	0	0	0	0	0	0	0	2	0	0	0	0	0	0	0	0	0	0	0	0	0	0	0	1	0	0	0	0	0	0	0	0	0	0	0	0	0	0	0	0	0	0
	Ascidia curvata	0	0	0	0	0	0	14	6	15	0	3	4	2	0	0	0	0	0	0	0	0	0	0	0	0	0	0	0	0	0	0	0	0	0	0	0	0	0	0	0	7	11	0	0	0	3	0	0
	Ascidia sp	0	0	0	0	0	0	0	0	0	0	0	0	0	0	0	0	0	0	0	0	0	0	0	0	0	0	0	0	0	0	0	0	0	0	0	0	0	0	0	0	0	0	0	0	0	0	0	2
	Ascidia interrupta	0	0	0	0	0	45	11	0	0	0	0	0	0	3	0	0	0	0	0	0	0	0	0	4	0	7	0	0	20	0	0	0	0	0	0	0	0	0	0	25	0	0	0	15	0	15	6	14
	Ciona intestinales	0	0	0	0	0	0	0	0	0	0	0	0	0	0	0	6	0	0	0	0	0	0	0	0	0	0	0	0	0	0	0	0	0	0	0	0	0	0	0	0	8	0	0	0	0	0	0	12
	Herdmania pallida	0	0	0	2	3	3	0	0	10	0	0	0	0	0	0	0	7	7	0	0	0	2	5	0	1	0	0	0	0	0	0	0	0	0	0	0	0	0	0	0	15	9	0	8	0	5	3	0
	Microcosmus exasperatus	0	0	0	0	6	0	0	0	0	0	0	0	0	0	0	0	0	0	1	0	0	0	0	0	0	0	0	0	0	0	0	0	0	0	0	0	0	0	0	0	0	0	0	0	0	0	0	11
	Phallusia nigra	0	4	0	3	51	0	3	2	10	5	20	13	0	14	13	12	17	31	10	1	0	14	4	21	52	11	37	50	23	19	27	7	9	0	28	21	0	0	0	0	0	0	0	0	0	0	0	0
	Pinctada sp.	0	0	0	0	0	0	0	1	0	1	0	0	0	0	0	0	0	0	0	0	0	0	0	0	0	0	0	0	0	0	0	0	0	0	0	0	0	0	0	0	0	0	0	0	0	0	0	0
	Ostreidae	0	3	0	0	0	2	0	0	0	0	0	0	0	0	0	0	0	0	0	0	0	0	0	0	0	0	0	0	0	0	0	0	0	0	0	0	0	0	4	1	0	0	0	0	0	0	5	0
	branchiomma luctuosum	0	0	0	0	0	0	0	3	0	0	0	1	0	0	0	0	0	0	0	0	0	0	0	0	0	0	0	4	0	0	0	0	2	0	0	1	0	6	12	6	2	3	0	1	6	12	1	8
	Serpulidae	0	0	0	0	0	0	1	1	0	0	0	0	0	0	0	0	0	0	0	0	0	0	1	0	0	0	0	0	0	0	0	0	0	0	0	0	0	1	0	0	0	0	0	0	0	0	0	0
	Bare Space	19	22	8	4	11	10	17	23	19	2	33	17	12	3	6	10	2	11	7	3	0	5	18	3	14	15	8	11	10	14	22	4	2	9	5	4	13	35	38	7	27	1	25	19	26	12	7	15
	Colonials (COL)	81	71	92	91	29	40	54	64	46	92	44	65	86	80	81	72	74	51	82	96	100	79	72	72	33	67	55	35	47	67	51	89	87	91	67	74	87	58	46	61	41	76	75	57	68	53	78	38
	Solitaries (SOL)	0	7	0	5	60	50	29	13	35	6	23	18	2	17	13	18	24	38	11	1	0	16	10	25	53	18	37	54	43	19	27	7	11	0	28	22	0	7	16	32	32	23	0	24	6	35	15	47
	COLONIALS COUNT	2	3	2	5	3	5	8	10	7	4	5	3	5	3	3	4	3	3	3	4	3	5	9	6	5	4	5	7	7	7	4	7	5	3	6	5	5	6	3	6	6	7	9	8	8	4	9	3
	SOLITARIES COUNT	0	2	0	2	3	3	4	5	3	2	2	3	1	2	1	2	2	2	2	1	0	2	3	2	2	2	1	2	2	1	1	1	2	0	1	2	0	2	2	3	4	3	0	3	1	4	4	5
[truncated: 60 more columns]

## Sheet: Growth 2016
						Area (sq. cm)							Standardized areas (z-score)
panel number	species	form	competition	predation	replicate	0 weeks	2 weeks	4 weeks	6 weeks	8 weeks	10 weeks	12 weeks	0 weeks	2 weeks	4 weeks	6 weeks	8 weeks	10 weeks	12 weeks
103	Aplidium accarense	COLONIAL	cleaned	cage	1	2.849	12.572	19.093	33.388	26.792			0.856361	1.96596	1.81136	1.97733	1.77631
92	Aplidium accarense	COLONIAL	cleaned	cage	2	2.603	0.213						-0.429651	-1.10245
89	Aplidium accarense	COLONIAL	cleaned	cage	3	2.679	4.686	5.026	5.427	4.516			-0.0323463	0.00807714	-0.285347	-0.552301	-0.387661
68	Aplidium accarense	COLONIAL	cleaned	cage	4	2.494	4.899	5.377	6.059	3.095			-0.999469	0.0609593	-0.23303	-0.495124	-0.525702
108	Aplidium accarense	COLONIAL	cleaned	fence	1	2.484	1.823						-1.05175	-0.702728
62	Aplidium accarense	COLONIAL	cleaned	fence	2	2.62	0.238	0.713					-0.34078	-1.09624	-0.928206
57	Aplidium accarense	COLONIAL	cleaned	fence	3	2.787	1.952						0.532244	-0.670701
12	Aplidium accarense	COLONIAL	cleaned	fence	4	2.74	2.501	2.208	2.65	2.684	1.604	1.367	0.286543	-0.534399	-0.705374	-0.803536	-0.565627	-0.796952	-0.910679
49	Aplidium accarense	COLONIAL	uncleaned	cage	1	2.257	2.635	2.357	3.435	2.047			-2.23843	-0.50113	-0.683165	-0.732517	-0.627508
18	Aplidium accarense	COLONIAL	uncleaned	cage	2	2.828	12.285	17.971	27.689	28.811	19.949	24.394	0.74658	1.8947	1.64413	1.46174	1.97244	1.30696	1.39197
73	Aplidium accarense	COLONIAL	uncleaned	cage	3	2.724	2.98	2.075					0.2029	-0.415476	-0.725198
100	Aplidium accarense	COLONIAL	uncleaned	cage	4	2.687	10.157	16.267	18.568	5.175	10.804	10.489	0.00947519	1.36638	1.39014	0.636565	-0.323643	0.258158	0.00149997
96	Aplidium accarense	COLONIAL	uncleaned	fence	1	2.885							1.04456
84	Aplidium accarense	COLONIAL	uncleaned	fence	2	2.478	4.437	2.957	8.48	6.965	1.855	5.646	-1.08311	-0.0537428	-0.593734	-0.276096	-0.149756	-0.768166	-0.482789
22	Aplidium accarense	COLONIAL	uncleaned	fence	3	3.02	2.048	4.313	4.922	2.927			1.7503	-0.646867	-0.39162	-0.597988	-0.542022
113	Aplidium accarense	COLONIAL	uncleaned	fence	4	2.828	6.376	4.928	4.7	2.054			0.74658	0.427658	-0.299954	-0.618073	-0.626828
121	Botrylloides niger	COLONIAL	cleaned	cage	1	2.256	30.027	131.993	87.88	22.27			0.304944	1.34122	2.09446	1.02401	0.336138
56	Botrylloides niger	COLONIAL	cleaned	cage	2	2.299	31.543	70.686	8.172				0.477053	1.48978	0.624208	-1.10868
110	Botrylloides niger	COLONIAL	cleaned	cage	3	1.651	22.829	121.328	111.456	30.644			-2.11659	0.635877	1.83869	1.65482	0.927486
126	Botrylloides niger	COLONIAL	cleaned	cage	4	2.18	10.095						0.000750476	-0.611955
69	Botrylloides niger	COLONIAL	cleaned	fence	1	1.886	12.82	34.409	92.652	41.493	14.939	8.464	-1.176	-0.344926	-0.245778	1.15169	1.69361	2.28648	2.15719
123	Botrylloides niger	COLONIAL	cleaned	fence	2	2.177	18.05	18.177	11.282				-0.0112571	0.167573	-0.635049	-1.02547
94	Botrylloides niger	COLONIAL	cleaned	fence	3	2.605	10.389	48.883	87.792	35.021			1.70183	-0.583145	0.101334	1.02166	1.23658
63	Botrylloides niger	COLONIAL	cleaned	fence	4	2.079	3.844	10.007	22.055	9.876	7.479	5.498	-0.403506	-1.2245	-0.83098	-0.737221	-0.539091	0.566941	1.07495
112	Botrylloides niger	COLONIAL	uncleaned	cage	1	2.553	28.314	102.602	107.717	36.733	9.053	4.18	1.4937	1.17336	1.38961	1.55478	1.35747	0.92975	0.59403
72	Botrylloides niger	COLONIAL	uncleaned	cage	2	2.354	32.827	25.53	12.698	1.952	1.083	0.316	0.697192	1.6156	-0.458712	-0.98758	-1.09866	-0.907345	-0.815879
115	Botrylloides niger	COLONIAL	uncleaned	cage	3	2.249	8.661	14.441	33.683	6.496	2.07	0.387	0.276926	-0.752476	-0.724645	-0.426099	-0.777777	-0.67984	-0.789972
26	Botrylloides niger	COLONIAL	uncleaned	cage	4	1.867	21.835	18.976	24.002	2.202	1.85	2.344	-1.25204	0.538473	-0.615888	-0.685127	-1.08101	-0.730551	-0.0758957
45	Botrylloides niger	COLONIAL	uncleaned	fence	1	1.989	5.2	19.508	31.433	8.79	4.508	0.489	-0.763735	-1.09163	-0.60313	-0.486301	-0.615782	-0.117878	-0.752754
54	Botrylloides niger	COLONIAL	uncleaned	fence	2	2.121	8.033	17.908	31.075	10.869	3.737	0.169	-0.235399	-0.814015	-0.6415	-0.49588	-0.468969	-0.295595	-0.869517
67	Botrylloides niger	COLONIAL	uncleaned	fence	3	2.217	4.314	22.057	57.601	17.328	3.766	2.397	0.148844	-1.17845	-0.542	0.213858	-0.0128523	-0.28891	-0.0565569
86	Botrylloides niger	COLONIAL	uncleaned	fence	4	2.394	12.658	13.358	24.625	3.956	1.709	1.276	0.857294	-0.360801	-0.750617	-0.668458	-0.957145	-0.763051	-0.465591
2	Clavelina oblonga	COLONIAL	cleaned	cage	1	2.684							0.132665
32	Clavelina oblonga	COLONIAL	cleaned	cage	2	1.966	2.341	7.821	11.058	8.848	8.211	8.032	-0.894327	-0.757442	-0.422447	-0.144513	0.338381	0.264748	0.088255
27	Clavelina oblonga	COLONIAL	cleaned	cage	3	2.368	5.175	10.592	11.289	9.844	9.012	9.435	-0.319326	0.753497	0.416272	-0.102853	0.723996	0.550162	0.628437
58	Clavelina oblonga	COLONIAL	cleaned	cage	4	2.78	2.4	6.874	5.674	4.944	4.311	6.667	0.269979	-0.725986	-0.709082	-1.11551	-1.17311	-1.12491	-0.437297
128	Clavelina oblonga	COLONIAL	cleaned	fence	1	1.951							-0.915782
8	Clavelina oblonga	COLONIAL	cleaned	fence	2	2.925	1.881	5.134	6.177	4.241	2.244	3.376	0.477379	-1.00269	-1.23574	-1.02479	-1.44528	-1.86143	-1.7044
51	Clavelina oblonga	COLONIAL	cleaned	fence	3	3.391							1.14392
39	Clavelina oblonga	COLONIAL	cleaned	fence	4	3.96	2.987	9.69	10.749	9.213	8.725	8.239	1.95779	-0.413029	0.143257	-0.200241	0.479696	0.447898	0.167954
4	Clavelina oblonga	COLONIAL	uncleaned	cage	1	1.328	2.705	8.874	11.228	10.244	10.776	9.865	-1.80689	-0.563376	-0.103727	-0.113854	0.878862	1.17872	0.793996
71	Clavelina oblonga	COLONIAL	uncleaned	cage	2	1.791	5.942	12.346	19.072	9.029			-1.14464	1.16242	0.947168	1.3008	0.408458
81	Clavelina oblonga	COLONIAL	uncleaned	cage	3	2.767	6.196	10.099	19.976	8.484	8.977	9.032	0.251384	1.29784	0.267052	1.46383	0.197453	0.537691	0.473275
95	Clavelina oblonga	COLONIAL	uncleaned	cage	4	1.684							-1.29769
87	Clavelina oblonga	COLONIAL	uncleaned	fence	1	3.025							0.620415
28	Clavelina oblonga	COLONIAL	uncleaned	fence	2	3.127							0.76631
117	Clavelina oblonga	COLONIAL	uncleaned	fence	3	3.087	6.203	15.785	18.227	10.914	9.48	11.283	0.709096	1.30157	1.98808	1.14841	1.13826	0.716922	1.33995
118	Clavelina oblonga	COLONIAL	uncleaned	fence	4	2.626	1.787	4.952	5.143	3.979	5.476	4.296	0.0497047	-1.05281	-1.29083	-1.21127	-1.54672	-0.709795	-1.35018
76	Didemnum galacteum	COLONIAL	cleaned	cage	1	2.551	13.06	57.215	88.56	61.454			0.176687	1.32956	1.3332	1.31815	2.18203
5	Didemnum galacteum	COLONIAL	cleaned	cage	2	2.086	10.701	13.439	25.231	14.454	7.973	5.901	-1.18696	0.827161	-0.374477	-0.203926	-0.101974	0.59552	-0.266612
34	Didemnum galacteum	COLONIAL	cleaned	cage	3	2.554	9.277	43.105	62.3	15.949	18.984	20.625	0.185485	0.523892	0.782778	0.687003	-0.0293235	2.2621	1.38976
42	Didemnum galacteum	COLONIAL	cleaned	cage	4	2.085	10.746	45.942	54.843	28.515	8.471	17.841	-1.18989	0.836745	0.893448	0.507779	0.581331	0.670895	1.07657
85	Didemnum galacteum	COLONIAL	cleaned	fence	1	3.008	2.077	1.72	0.407	0.019	0.037		1.51687	-1.00949	-0.831629	-0.800555	-0.803454	-0.605644
79	Didemnum galacteum	COLONIAL	cleaned	fence	2	2.598	2.788	2.177	1.275	1.116	0.295		0.314518	-0.858068	-0.813802	-0.779693	-0.750144	-0.566594
37	Didemnum galacteum	COLONIAL	cleaned	fence	3	2.429	2.085						-0.181086	-1.00779
74	Didemnum galacteum	COLONIAL	cleaned	fence	4	3.146	2.736	2.525	0.127	0.011	0.019	0.019	1.92156	-0.869143	-0.800226	-0.807285	-0.803843	-0.608368	-0.928306
15	Didemnum galacteum	COLONIAL	uncleaned	cage	1	2.33	14.958	28.859	44.701				-0.47141	1.73377	0.227049	0.264023
125	Didemnum galacteum	COLONIAL	uncleaned	cage	2	2.415	9.367						-0.222142	0.54306
90	Didemnum galacteum	COLONIAL	uncleaned	cage	3	2.285	12.848	76.541	135.146	40.37			-0.603375	1.28441	2.0871	2.43781	1.15743
53	Didemnum galacteum	COLONIAL	uncleaned	cage	4	2.388	7.512	42.743	52.617	35.509			-0.301321	0.148001	0.768657	0.454278	0.92121
6	Didemnum galacteum	COLONIAL	uncleaned	fence	1	2.985	3.047	2.433	2.872				1.44942	-0.802909	-0.803815	-0.74131
101	Didemnum galacteum	COLONIAL	uncleaned	fence	2	2.722	2.167	1.119	0.758	0.126	0.02		0.678156	-0.990323	-0.855074	-0.792119	-0.798254	-0.608217
50	Didemnum galacteum	COLONIAL	uncleaned	fence	3	2.309	2.348	2.65	3.031	0.916	0.407	5.2	-0.532994	-0.951775	-0.79535	-0.737489	-0.759864	-0.549642	-0.345471
114	Didemnum galacteum	COLONIAL	uncleaned	fence	4	1.961	3.356	2.073	0.153	0.19	0.14	0.04	-1.55353	-0.737102	-0.817859	-0.80666	-0.795144	-0.590054	-0.925944
35	Herdmania pallida	SOLITARY	cleaned	cage	1	2.288	9.248	11.733	10.703	10.505	10.822		-0.374141	1.31715	0.811419	-0.252283	1.15722	1.06508
29	Herdmania pallida	SOLITARY	cleaned	cage	2	1.815	8.912	13.162	14.68	10.748	11.708	12.621	-1.12163	1.11503	1.36602	1.27396	1.26359	1.52674	1.86779
91	Herdmania pallida	SOLITARY	cleaned	cage	3	2.663	7.778	12.166	13.243	8.424	7.5	7.523	0.218479	0.432883	0.979468	0.722487	0.246298	-0.665868	-0.106453
93	Herdmania pallida	SOLITARY	cleaned	cage	4	2.169	4.626	9.607	10.456	8.482	8.577	8.344	-0.562199	-1.46317	-0.0136871	-0.347073	0.271687	-0.104689	0.211486
17	Herdmania pallida	SOLITARY	cleaned	fence	1	3.038	5.692	5.721					0.811099	-0.821929	-1.52185
119	Herdmania pallida	SOLITARY	cleaned	fence	2	1.767	5.021	8.186	9.107	7.736	8.08	6.535	-1.19749	-1.22556	-0.565181	-0.864776	-0.0548626	-0.363655	-0.489063
99	Herdmania pallida	SOLITARY	cleaned	fence	3	2.814	7.721	10.33	8.587	7.98	8.064	7.325	0.457107	0.398595	0.266911	-1.06433	0.0519444	-0.371991	-0.18313
10	Herdmania pallida	SOLITARY	cleaned	fence	4	2.566	5.73	5.484	6.866	5.935	6.122	5.079	0.0651882	-0.79907	-1.61383	-1.7248	-0.843221	-1.38388	-1.05291
98	Herdmania pallida	SOLITARY	uncleaned	cage	1	2.757	4.604						0.367029	-1.4764
48	Herdmania pallida	SOLITARY	uncleaned	cage	2	1.454	5.903	7.773	12.742	4.955	9.554	4.822	-1.69213	-0.695004	-0.725468	0.530219	-1.2722	0.404384	-1.15244
60	Herdmania pallida	SOLITARY	uncleaned	cage	3	3.649	6.536	8.383	14.603	6.391			1.77667	-0.314229	-0.488725	1.24441	-0.643614
1	Herdmania pallida	SOLITARY	uncleaned	cage	4	2.839	9.185	14.195	14.923	11.542	11.706	11.077	0.496615	1.27925	1.76693	1.36722	1.61115	1.5257	1.26986
7	Herdmania pallida	SOLITARY	uncleaned	fence	1	3.089	7.158	7.126					0.891695	0.0599284	-0.97657
52	Herdmania pallida	SOLITARY	uncleaned	fence	2	1.653	7.399	9.833	10.331	7.423	7.925		-1.37764	0.204899	0.0740241	-0.395044	-0.191873	-0.444418
25	Herdmania pallida	SOLITARY	uncleaned	fence	3	3.38	8.067	9.754	9.033		9.301	6.855	1.35157	0.606728	0.043364	-0.893175		0.272556	-0.365141
36	Herdmania pallida	SOLITARY	uncleaned	fence	4	2.455	9.354	11.181	12.411	4.215	5.976		-0.110227	1.38091	0.597187	0.403192	-1.59612	-1.45996
3	Polyandrocarpa zorritensis	COLONIAL	cleaned	cage	1	0.991	4.393	13.632	28.361	22.607	3.461	0.462	-1.43832	0.452897	0.30148	1.94256	0.955144	-0.992228	-0.749002
59	Polyandrocarpa zorritensis	COLONIAL	cleaned	cage	2	1.501	2.375	9.953	17.961	15.944			-0.455101	-0.311679	-0.342041	-0.207255	0.0314876
105	Polyandrocarpa zorritensis	COLONIAL	cleaned	cage	3	2.655	2.291	8.524	14.525	15.032	9.447	0.722	1.76968	-0.343505	-0.591998	-0.91752	-0.0949381	1.0076	-0.386582
16	Polyandrocarpa zorritensis	COLONIAL	cleaned	cage	4	2.143	5.288	12.863	18.691	21.013			0.7826	0.791993	0.166968	-0.056355	0.734176
23	Polyandrocarpa zorritensis	COLONIAL	cleaned	fence	1	1.912							0.337259
80	Polyandrocarpa zorritensis	COLONIAL	cleaned	fence	2	2.225	0.109	0.443					0.940687	-1.17022	-2.0055
21	Polyandrocarpa zorritensis	COLONIAL	cleaned	fence	3	1.644							-0.179414
109	Polyandrocarpa zorritensis	COLONIAL	cleaned	fence	4	1.684	0.063						-0.102298	-1.18764
102	Polyandrocarpa zorritensis	COLONIAL	uncleaned	cage	1	1.875	7.835	16.055	12.52	9.041			0.265927	1.757	0.725304	-1.33198	-0.925439
43	Polyandrocarpa zorritensis	COLONIAL	uncleaned	cage	2	1.181	6.072	21.21	22.191	22.647	6.385	1.814	-1.07202	1.08903	1.627	0.667139	0.960689	-0.0153678	1.13558
11	Polyandrocarpa zorritensis	COLONIAL	uncleaned	cage	3	1.205	1.895	14.107	17.572				-1.02575	-0.49354	0.384565	-0.287666
64	Polyandrocarpa zorritensis	COLONIAL	uncleaned	cage	4	1.757	4.701	10.389	19.888	3.734			0.0384372	0.569591	-0.265777	0.19108	-1.66112
13	Polyandrocarpa zorritensis	COLONIAL	uncleaned	fence	1	2.24							0.969605
88	Polyandrocarpa zorritensis	COLONIAL	uncleaned	fence	2	2.145							0.786456
116	Polyandrocarpa zorritensis	COLONIAL	uncleaned	fence	3	0.704							-1.99162
107	Polyandrocarpa zorritensis	COLONIAL	uncleaned	fence	4	1.931	0.152						0.373889	-1.15392
75	Styela plicata	SOLITARY	cleaned	cage	1	0.629							-0.892904
44	Styela plicata	SOLITARY	cleaned	cage	2	1.418	5.751	9.199	12.822	8.327	13.39	10.699	0.553154	1.05005	1.31113	0.943393	0.602055	0.907035	0.319624
47	Styela plicata	SOLITARY	cleaned	cage	3	0.547	1.572	3.96	7.102	4.63			-1.04319	-1.85127	-2.02734	-1.46491	-2.68707
104	Styela plicata	SOLITARY	cleaned	cage	4	0.729	4.879	8.619	11.89	7.096	11.055	9.35	-0.709627	0.444652	0.941533	0.550991	-0.493134	0.189973	-0.381755
65	Styela plicata	SOLITARY	cleaned	fence	1	1.772	6.569	8.21	13.857	8.495	14.484	11.645	1.20196	1.61796	0.680905	1.37916	0.751521	1.243	0.811473
40	Styela plicata	SOLITARY	cleaned	fence	2	0.895	3.656	8.179	10.57	8.049	12.168	13.777	-0.405386	-0.404431	0.661151	-0.0047717	0.354726	0.531767	1.91995
106	Styela plicata	SOLITARY	cleaned	fence	3	2.655	3.866	7.615	10.475	8.25	13.942	9.616	2.82029	-0.258636	0.301751	-0.0447698	0.533551	1.07655	-0.243455
70	Styela plicata	SOLITARY	cleaned	fence	4	1.501	4.716	7.658	15.886	7.384	10.935		0.705274	0.331487	0.329152	2.23344	-0.236908	0.153121
46	Styela plicata	SOLITARY	uncleaned	cage	1	0.767	1.598	4.967	11.004	8.179	6.588	6.694	-0.639981	-1.83322	-1.38564	0.177956	0.470384	-1.18181	-1.76268
78	Styela plicata	SOLITARY	uncleaned	cage	2	0.965	2.98	7.118	10.397	8.688	5.421	10.657	-0.277092	-0.873753	-0.0149537	-0.0776103	0.923228	-1.54019	0.297787
55	Styela plicata	SOLITARY	uncleaned	cage	3	0.966	3.235	4.91	7.852	7.705	7.682	9.064	-0.275259	-0.696716	-1.42196	-1.14914	0.0486779	-0.845853	-0.530453
20	Styela plicata	SOLITARY	uncleaned	cage	4	0.688	5.605	5.598	8.073	6.021			-0.78477	0.948687	-0.983548	-1.05609	-1.44953
14	Styela plicata	SOLITARY	uncleaned	fence	1	0.957	4.546	7.323	10.566	8.404	9.979	12.554	-0.291754	0.213463	0.115679	-0.00645583	0.67056	-0.14046	1.28408
33	Styela plicata	SOLITARY	uncleaned	fence	2	0.991	5.348	8.151	10.752	7.445	7.995	9.667	-0.22944	0.770261	0.643308	0.0718562	-0.182637	-0.749733	-0.216939
9	Styela plicata	SOLITARY	uncleaned	fence	3	0.825	4.77	7.033	8.252		15.006	8.329	-0.53368	0.368977	-0.0691185	-0.980724		1.4033	-0.912598
127	Styela plicata	SOLITARY	uncleaned	fence	4	1.554	4.487	8.582	9.222	8.431	7.028	8.959	0.802411	0.172501	0.917955	-0.572323	0.694582	-1.04669	-0.585045
41	Polyclinum constellatum	COLONIAL	cleaned	cage	1	1.481	3.365	6.579	8.669	8.964	9.098	7.571	0.894558	1.81266	1.83241	2.02984	2.29829	1.61812	1.3604
82	Polyclinum constellatum	COLONIAL	cleaned	cage	2	0.904	1.177	1.774	2.704	2.257			-1.19305	-0.534561	-0.646243	-0.327738	-0.30046
19	Polyclinum constellatum	COLONIAL	cleaned	cage	3	1.092	1.432	2.227	3.674	3.742	4.504	4.056	-0.512856	-0.261005	-0.412564	0.0556404	0.27493	0.322203	0.117889
83	Polyclinum constellatum	COLONIAL	cleaned	cage	4	0.872							-1.30882
24	Polyclinum constellatum	COLONIAL	cleaned	fence	1	1.08							-0.556272
66	Polyclinum constellatum	COLONIAL	cleaned	fence	2	1.671							1.58198
111	Polyclinum constellatum	COLONIAL	cleaned	fence	3	1.606	1.902	2.217	1.534	1.434	1.171	1.218	1.34681	0.243197	-0.417722	-0.790164	-0.619347	-0.618002	-0.885314
61	Polyclinum constellatum	COLONIAL	cleaned	fence	4	1.176	1.754	1.834	2.034	1.137	1.387		-0.208941	0.084427	-0.615292	-0.592546	-0.734425	-0.557071
31	Polyclinum constellatum	COLONIAL	uncleaned	cage	1	1.363							0.46763
120	Polyclinum constellatum	COLONIAL	uncleaned	cage	2	0.87	1.459	4.752	2.947	2.728			-1.31606	-0.23204	0.889953	-0.231696	-0.117963
30	Polyclinum constellatum	COLONIAL	uncleaned	cage	3	1.071	2.123	5.148	6.769	4.828			-0.588834	0.480279	1.09423	1.27889	0.695721
124	Polyclinum constellatum	COLONIAL	uncleaned	cage	4	1.001	0.529	1.57	2.28	1.292	0.649	2.045	-0.842096	-1.22972	-0.751476	-0.495318	-0.674367	-0.765253	-0.592978
97	Polyclinum constellatum	COLONIAL	uncleaned	fence	1	1.618							1.39023
122	Polyclinum constellatum	COLONIAL	uncleaned	fence	2	1.228	0.285						-0.0208037	-1.49147
77	Polyclinum constellatum	COLONIAL	uncleaned	fence	3	1.177							-0.205323
38	Polyclinum constellatum	COLONIAL	uncleaned	fence	4	1.53	2.727	1.14	1.188	0.91			1.07184	1.12823	-0.973291	-0.926915	-0.82238
